# Supplementary material for: Accumulation of Amino Acids and Flavonoids in Young Tea Shoots Is Highly Correlated With Carbon and Nitrogen Metabolism in Roots and Mature Leaves
Source: Front Plant Sci. 2021 Nov 18;12:756433. doi: 10.3389/fpls.2021.756433 (PMC8636729; doi:10.3389/fpls.2021.756433)
Supplement: Supplementary file 1 [file Table_1.xlsx]

## Sheet: Differential metabolites
Table S1 Differential metabolites identified by UPLC-Q-TOFMS and GC×GCTOFMS.
Organs	Cultivar	Metabolite	N2/N		N3/N1		N3/N2
			Fold	VIP	Fold	VIP	Fold	VIP
Org-acids
Leaves	Longjing	Succinate			1.14	1.07	1.1	1.05
Leaves	Longjing	2-Butenoic acid	4.51652	0.87			0.174628	0.95
Leaves	Longjing	2-Isopropylmalic acid	0.726285	1.02	0.736295	1.05
Leaves	Longjing	Ketoglutarate	0.945872	0.89			1.05196	1.01
Leaves	Longjing	Acetic acid	0.584247	1.56	0.474857	1.25	0.812766	0.69
Leaves	Longjing	Allonic acid	0.964918	0.69202	0.862921	1.39135	0.894294	1.73657
Leaves	Longjing	Ascorbic acid	0.903706	0.814	0.907889	1.269
Leaves	Longjing	Butanedioic acid	0.79	2.93	0.9	1.04	1.14	1.61
Leaves	Longjing	Butanoic acid	1.18604	1.08549	1.27126	1.07802	1.07186	1.0373
Leaves	Longjing	Cinnamic acid	0.92	1.01	1.19	1.003	1.29	1.09
Leaves	Longjing	Oxalic acid			1.11515	1.07217	1.13245	1.08962
Leaves	Longjing	Ethanesulfonic acid	1.16194	0.84	0.597599	0.95	0.514313	1.02
Leaves	Longjing	Glyoxylate	0.62	1.51	0.59	1.42
Leaves	Longjing	Hydroxypyruvic acid	3.02135	1.34	3.98383	1.25	1.31856	0.81
Leaves	Longjing	Methylmaleic acid	1.09034	1.16264	0.787896	1.36421	0.722618	1.54344
Leaves	Longjing	Pentanedioic acid			0.956744	0.76	0.939594	0.51
Leaves	Longjing	Pentenoic acid	1.32128	0.89	1.04143	0.55	0.7882	0.98
Leaves	Longjing	Propanedioic acid	1.19889	0.881873	1.39517	0.824033	1.16371	0.872473
Leaves	Longjing	Propanetriol	0.645171	2.17022	0.93942	0.105493	1.45608	1.85739
Leaves	Longjing	Propanoic acid	0.969373	0.139301	1.04451	0.328093	1.07752
Leaves	Longjing	Shikimic acid	0.917843	0.8541	0.830754	1.0236	0.905116	0.524
Leaves	Longjing	Tartaric acid	0.72	1.41	0.8	1.14	1.11	0.59
Root	Longjing	Succinate	0.874245	1.02	1.18476	1.01	1.35518	1.08
Root	Longjing	2-Butenoic acid	0.877619	0.85	0.669393	1.05	0.762738	1.05
Root	Longjing	2-Isopropyl-3-ketobutyrate	4.45993	4.57	2.70679	0.64	0.606912	3.74
Root	Longjing	2-Ketoisocaproic acid	8.50781	1.19	20.1088	1.69	2.36357	1.83
Root	Longjing	Acetic acid	2.74107	1.15	0.418296	1.14	0.152603	1.25
Root	Longjing	Allonic acid	1.85058	0.922	1.35647	0.61353	0.732997	0.9541
Root	Longjing	Butanedioic acid	0.852004	0.81	0.762181	0.75	0.894575	0.93
Root	Longjing	Cinnamic acid	0.707414	1	0.41183	1.05	0.582162	1.03
Root	Longjing	Citrate	0.906194	1.03	0.854977	1.06	0.943481	0.77
Root	Longjing	Oxalic acid	1.95019	1.06	2.23965	1.06
Root	Longjing	Fumaric acid	3.01515	1	3.57588	1.84	1.18597	1.08
Root	Longjing	Hydroxypyruvic acid	1.16298	1.03	1.4485	1.07	1.2455	1.03
Root	Longjing	Malonic acid			0.210805	1.08	0.205851	1.13
Root	Longjing	Pentanedioic acid	1.18841	0.52			0.851073	0.75
Root	Longjing	Pentenoic acid	1.42289	0.79	1.47441	0.81
Root	Longjing	Propanedioic acid	1.07527	0.34	1.3749	1.01	1.27866	0.87
Root	Longjing	Propanoic acid	1.16829	1.01	1.09278	1.13	0.935372	0.8541
Root	Longjing	Shikimic acid	1.13626	1.05962			0.84782	1.08
Root	Longjing	Tartaric acid	2.04325	1.32	2.02411	1.24
Shoot	Longjing	Succinate	1.2	1.07	1.49	1.02	1.25	1.04
Shoot	Longjing	2-Isopropyl-3-ketobutyrate	1.77	2.24	2.4	1.99	1.36	1.14
Shoot	Longjing	2-Isopropylmalic acid	1.53246	0.72097	1.19505	0.244973	0.77983	0.633892
Shoot	Longjing	Ketoglutarate	1.07	1.19	1.17	1.1	1.09	1.14
Shoot	Longjing	2-Ketoisocaproic acid			0.929003	0.888628	0.905421	0.967367
Shoot	Longjing	Acetic acid	1.50502	1.35804	2.14929	1.31117	1.42808	1.21671
Shoot	Longjing	Allonic acid	0.935444	1.15632	1.30534	3.35581	1.39542	4.73813
Shoot	Longjing	Ascorbic acid	1.15505	2.30209	1.41	2.15178	1.22072	1.64589
Shoot	Longjing	Butanedioic acid	0.647811	5.54422	0.592156	5.42666	0.914088	3.33776
Shoot	Longjing	Butanoic acid	1.39	1.03	1.68	1.03	1.21219	0.301217
Shoot	Longjing	Cinnamic acid			1.27	1.07	1.23	1.02
Shoot	Longjing	Citrate	0.61	2.21	0.43	2.21	0.7	2.3
Shoot	Longjing	Oxalic acid	1.75	1.31	1.91	0.83	1.09	1.19
Shoot	Longjing	Ethanesulfonic acid			1.12	1.03	1.08	1.08
Shoot	Longjing	Ethanol	1.99	1.14	2.96	1.09	1.48	1.06
Shoot	Longjing	Fumaric acid	1.47	1.14	1.97	1.07	1.34	1.05
Shoot	Longjing	Glyoxylate	1.89	1.12	2.65	1.97	1.4	1.46
Shoot	Longjing	Hydroxypyruvic acid	0.73	1.01			1.44	1.17
Shoot	Longjing	Isocitric	0.72	1.15	0.66	1
Shoot	Longjing	Malic acid	1.48	1.16	1.23	1.18	0.83	1.11
Shoot	Longjing	Octanoic acid	1.10639	0.868196	1.66063	0.89809	1.50094	0.855458
Shoot	Longjing	Pentanedioic acid	0.78	1.03			1.23	1.12
Shoot	Longjing	Pentenoic acid	1.1	1.07	1.32	1.07	1.21	1.02
Shoot	Longjing	Propanedioic acid	1.54	1.22	1.3	1.14	0.85	1.07
Shoot	Longjing	Propanetriol	0.909927	1.52864	1.09534	0.614865	1.20377	0.423952
Shoot	Longjing	Propanoic acid	0.61	1.07	0.7	1.02
Shoot	Longjing	Pyruvic acid	0.813993	0.264237	0.711974	1.10838	0.874668	1.18063
Shoot	Longjing	Shikimic acid	0.66	1.08			1.47	1.01
Shoot	Longjing	Tartaric acid			0.64	1.09	0.7	1.08
Carbohydrate
Shoot	Longjing	Erythritol	0.23	1.11	0.26	1.08
Shoot	Longjing	Galactopyranoside	0.258202	0.744037	0.761372	0.28081	2.94875	0.491366
Root	Longjing	Fucose	0.349488	1.18	0.712413	1.14	2.03844	1.15
Shoot	Longjing	Xylopyranose	0.39	2.44	0.65	1.2	1.68	1.2
Leaves	Longjing	Galactopyranose	0.43	1.07	0.33	1.87	0.76	1.43
Shoot	Longjing	Glucose	0.44	1.24	0.09	1.26	0.2	1.3
Leaves	Longjing	Glucose	0.58	1.38	0.73	1.31	1.26	1.26
Root	Longjing	Xylopyranose	0.589009	1.45	0.354904	1.62	0.602545	1.54
Shoot	Longjing	Mannopyranoside	0.618873	0.562591	0.978858	0.136735	1.58168	0.79802
Shoot	Longjing	Ribofuranose	0.62	1.17	0.18	1.1	0.29	1.03
Shoot	Longjing	Galactofuranoside	0.62	1.09	0.43	1.06	0.69	1.05
Root	Longjing	Glycerol	0.668012	1.07	1.66866	2.56	2.49795	1.2
Leaves	Longjing	Galactopyranoside	0.69	1.04	0.38	1.1	0.55	1.14
Shoot	Longjing	Xylose	0.71	1			1.5	1.11
Leaves	Longjing	Tagatofuranose	0.72	1.48	0.94	1.23	1.3	1.42
Leaves	Longjing	Sorbitol	0.73	1.49	1.12	1.09	1.54	1.62
Leaves	Longjing	Threonic acid	0.73	2.93			1.08	1.03
Shoot	Longjing	Tagatofuranose	0.74	1.07	0.79	1.01
Shoot	Longjing	Sorbitol	0.75	1.17	0.93	1.01	1.24	1.05
Leaves	Longjing	Levoglucosan	0.753245	0.74	0.376429	0.89	0.499744	0.64
Shoot	Longjing	Galactose	0.76	1.66	1.4	1.84	1.85	3.84
Shoot	Longjing	Glucofuranoside	0.77	1.02	0.56	1.02	0.73	1.12
Root	Longjing	Psicose	0.773951	1.35	0.512611	2.1	0.66233	2.03
Shoot	Longjing	Ribose	0.79	2.43	1.09	1.06	1.38	3.53
Root	Longjing	Sorbose	0.792003	1.04	0.470694	1.14	0.594308	2.11
Leaves	Longjing	Xylonic acid	0.8	1.06	0.87	1.09	1.09	1.39
Shoot	Longjing	Talopyranose	0.818707	0.94941	1.23833	1.48585	1.51254	3.3688
Leaves	Longjing	Erythrose	0.83	1.13	0.85	1.79
Root	Longjing	Arabinopyranose	0.830274		0.690549	3.86	0.831712	2.21
Root	Longjing	Erythrofuranose	0.833961	1.06	0.354835	1.08	0.425482	1.13
Root	Longjing	Ribofuranose	0.838779	0.84	0.385479	1.59	0.459572	1.12
Leaves	Longjing	Glucopyranoside	0.860602		0.543963		0.632073
Root	Longjing	Xylopyranose-phosphate	0.861026	1.21	1.06583	0.83	3.27134	1.42
Root	Longjing	Rhamnose	0.862503	1.13	0.668777	1.16	0.775391	1.19
Root	Longjing	Arabinonic acid	0.873385		0.346102		0.396276
Shoot	Longjing	Arabinose	0.88	1.02	1.22	1	1.38	1.24
Shoot	Longjing	Glucitol	0.88	1.06			1.15	1.02
Leaves	Longjing	Gluconic acid	0.882491		1.09284		1.23836
Leaves	Longjing	Talopyranose	0.89	2.15	0.51	5.2	0.57	6.06
Shoot	Longjing	Glucopyranose	0.892529	0.0568056	1.57524	0.0682693	1.76492	0.179739
Root	Longjing	Glucose	0.897402	1.14	0.693728	1.43	0.77304	2.11
Shoot	Longjing	Erythrose	0.9	1.23	1.17	1.04	1.3	1.3
Shoot	Longjing	Glucopyranoside	0.9	1.02			1.18	1.04
Shoot	Longjing	Mannose	0.903692	0.480355	1.43235	0.874959	1.585	1.75738
Root	Longjing	Erythro-Pentonic acid	0.903882	1.14			1.11233	1.14
Leaves	Longjing	Glucuronic acid	0.914962	0.83	0.620462	1.38	0.678128	1.57
Leaves	Longjing	Xylopyranose	0.92	1.19	0.55	2.92	0.6	2.82
Shoot	Longjing	Ribopyranose	0.924028	0.00427497	1.16021	0.700955	1.2556	1.19279
Shoot	Longjing	Arabinonic acid	0.93	1.06	0.79	1.08	0.85	1.19
Shoot	Longjing	Allonic acid	0.935444	1.15632	1.30534	3.35581	1.39542	4.73813
Root	Longjing	Galactopyranoside	0.937812		1.45989	1.05	1.55669	1.06
Leaves	Longjing	Allofuranose	0.939331	0.64	1.09097	0.8	1.16143	0.87
Shoot	Longjing	Erythro-Pentitol	0.94	1.03			1.08	1.04
Root	Longjing	Erythrose	0.949423	1.02	1.33813	1.04	1.40941	1.02
Root	Longjing	Arabinofuranose	0.956507		2.1724	1.04	2.27118	1.15
Shoot	Longjing	Erythrotetrofuranose	0.961017	0.120519	2.92298	0.319124	3.04155	0.4661
Root	Longjing	Arabitol	0.98857	1.01	1.0246	1.06	1.03645
Leaves	Longjing	Galactose	1.04	1.54	0.97	1.42	0.94	1.76
Shoot	Longjing	Lyxofuranose	1.07	2.95	1.16	2.62	1.08	1.2
Shoot	Longjing	Glycoside	1.0744	0.608795	1.13824	0.480307	1.05942	0.219224
Leaves	Longjing	Fucopyranose	1.08	1.08	0.88	1.05	0.82	1.45
Root	Longjing	Ribose	1.08015	0.76	1.19807	3.09	1.10917	1.66
Shoot	Longjing	Threonic acid	1.1	2.36	1.04	1.01	0.94	1.69
Shoot	Longjing	Galacturonic acid	1.12	1.86	1.44	2.4	1.28	2.45
Shoot	Longjing	Arabitol	1.15	1.12	1.6	1.18	1.39	1.33
Root	Longjing	Erythritol	1.15942	1.09			0.864905	1.1
Root	Longjing	Xylose	1.17194	1.16	1.12497	1.19	1.10714	1.05
Leaves	Longjing	Arabinose	1.18	1.76	1.23	1.71
Root	Longjing	Glucitol	1.18451	0.85	0.734598	0.91	0.620168	0.97
Shoot	Longjing	Mannonic acid	1.2	1.02	1.33	1.05	1.11	1.06
Root	Longjing	Lyxofuranose	1.20182	1.17	1.21843	1.05
Shoot	Longjing	Ribofuranose-phosphate	1.21	1.01	1.49	1.17	1.23	1.11
Leaves	Longjing	Inosose	1.21	1.38	2.25	1.7	1.87	1.71
Leaves	Longjing	Glycerol	1.21	1.58			0.84	1.56
Leaves	Longjing	Erythrofuranose	1.21176	0.936604	1.65247	0.98039	1.3637	0.880864
Root	Longjing	4-Ketoglucose	1.22171	0.92	1.31115	1.11	1.07321	1.04
Leaves	Longjing	Fucose	1.23	1.09	1.17	1.02
Shoot	Longjing	Glycerol	1.23	1.19			0.8	1.19
Leaves	Longjing	Pentonic acid	1.23742	0.89	1.06728	0.73	0.862504	0.92
Leaves	Longjing	Sorbose	1.27	1.44	1.11	1.26	0.87	1.33
Root	Longjing	Allofuranose	1.27691	1.18	1.38887	1.05	1.08769
Leaves	Longjing	Mannose	1.31	1.05	0.84	1.56	0.64	1.17
Leaves	Longjing	Glucopyranose	1.33	1.18	1.21	1.01
Shoot	Longjing	4-Ketoglucose	1.34	1.02	1.48	1.09
Leaves	Longjing	Erythro-Pentonic acid	1.37187	0.68	2.06802	0.86	1.50745	0.7
Shoot	Longjing	Gluconic acid	1.4	1.22	1.44	1.24
Root	Longjing	Pentonic acid	1.40571	1.32	1.51351	1.1	1.07668	1.11
Leaves	Longjing	Arabinonic acid	1.41	1.04	1.22	1
Root	Longjing	glucopyranoside	1.43284	1.32	2.04997	1.14	1.43071	1.37
Shoot	Longjing	Ribose 5-phosphate	1.44	1.05	2.14	1.09	1.48	1.01
Root	Longjing	Arabinose	1.45131	1.13	1.66543	1.1	1.14753
Leaves	Longjing	Rhamnose	1.46	2.23	1.63	2.02	1.12	0.85
Root	Longjing	Mannonic acid	1.49818	1.3	0.984901	1.19	0.6574	1.37
Shoot	Longjing	Glucuronic acid	1.5	1.03	1.87	1.08	1.24	1.09
Root	Longjing	Galactose	1.50323	2.27	1.30219	1.15	0.866264	1.32
Leaves	Longjing	Xylose	1.52	1.31	1.23	1.25	0.81	1.25
Shoot	Longjing	Psicose	1.54	4.56	2.17	4.11	1.41	2.84
Shoot	Longjing	Rhamnose	1.62	1.25	0.87	1.16	0.54	1.04
Leaves	Longjing	Erythritol	1.63	1.7	2.76	1.86	1.7	1.77
Shoot	Longjing	Erythrulose	1.73	1.04	2.03	1.06
Root	Longjing	Tagatose	1.78651	1.27	1.6709	1.28	0.935287	0.89
Leaves	Longjing	Fucitol	1.79	1.01	2.43	1.03	1.35	1.09
Root	Longjing	Allonic acid	1.85058	3.09	1.35647	1.03	0.732997	2.56
Root	Longjing	2-Deoxy-galactopyranose	1.94641	1.25	2.83129	1.56	1.45463	1.23
Leaves	Longjing	Ribofuranose-phosphate	2.06	1.52	1.88	1.44
Leaves	Longjing	Ribofuranose	2.06229	0.323513	1.88193	0.244978	0.912544	0.0106945
Shoot	Longjing	Erythro-pentose	2.08648	0.110827	2.13398	0.0877007	1.02277	0.0291169
Root	Longjing	Glycoside	2.17046	1.05	1.83864	1.61	0.84712	1.14
Root	Longjing	Lyxose	2.27971	1.3	1.92703	1.62	0.845295	1.11
Root	Longjing	Glucosamine	2.66734	0.814	2.86731	0.98	1.07497	0.64
Root	Longjing	Ribose 5-phosphate	2.67902	1.29	3.09064	3.08	1.15365	1.1
Root	Longjing	Galactopyranose	2.82889	1.35	3.17492	1.2	1.12232	1.08
Shoot	Longjing	Inosose	2.97	1.51	2.3	1.51	0.77	1.45
Root	Longjing	Inosose	86.0364	1.37	4.42318	1.29	0.0514105	1.73
Shoot	Longjing	Erythrofuranose	261.503	9.98689	326.543	6.42699	1.24872	1.90051
Leaves	Longjing	2-Deoxy-galactopyranose			0.490644	0.99	0.505211	0.91
Leaves	Longjing	Arabinopyranose			0.532371	0.943304	0.511399	0.982303
Shoot	Longjing	Sorbose			0.77	1.09	0.56	1
Leaves	Longjing	Glycoside			0.77	2.01	0.75	1.96
Leaves	Longjing	Erythro-Pentitol			0.792628	0.78	0.776942	0.85
Shoot	Longjing	Lyxose			0.81	1.01	0.86	1.06
Root	Longjing	Mannose			0.811771	1.06	0.825255	1.17
Leaves	Longjing	Allonic acid			0.86	1.59	0.89	1.94
Leaves	Longjing	Lyxofuranose			0.88	1.45	0.87	1.75
Leaves	Longjing	Glucosamine			0.91	1.23	0.91	1.22
Shoot	Longjing	2-Deoxy-galactopyranose			1.06	1.07	1.17	1.62
Root	Longjing	Talopyranose			1.0991	0.75	1.14163	0.86
Root	Longjing	Glucopyranose			1.12668	0.81	1.10468	0.91
Shoot	Longjing	Erythro-Pentofuranose			1.16	2.03	1.2	1.45
Shoot	Longjing	Talofuranose			1.23916	0.875282	1.3127	0.76
Shoot	Longjing	Fucitol			1.26	1.01	1.32	1.03
Leaves	Longjing	Ribose			1.27	1.02	1.26	1.15
Leaves	Longjing	Erythro-Pentofuranose			1.30613	0.831055	1.27261	0.812118
Shoot	Longjing	Erythro-Pentonic acid			1.53	1.02	1.27	1.03
Shoot	Longjing	Levoglucosan			1.6	1.08	1.52	1.17
Amino acids
Shoot	Longjing	Tryptophan	0.520161	1.51177	0.437733	1.38587	0.841534	1.13372
Shoot	Longjing	Methionine	0.56	1.32	0.8	1.1	1.45	1.1
Shoot	Longjing	Acetamide	0.59	1.1	0.42	1.18
Leaves	Longjing	Phenethylamine	0.672641	1.56	0.545734	1.49	0.811331	0.92
Root	Longjing	Phenethylamine	0.677049	1.54	0.594856	1.65	0.878601	0.95
Leaves	Longjing	Norleucine	0.71	1.53	0.45	1.57	0.64	1.46
Leaves	Longjing	Citrulline	0.71	2.42	0.71	1.62
Shoot	Longjing	Asparagine	0.717998	0.0999607	0.660296	0.0961049	0.919635	0.0822341
Shoot	Longjing	Homoserine	0.775975	0.0913543	1.06506	0.0166924	1.37254	0.101133
Root	Longjing	Phenylalanine	0.784763	1.39	0.783681	1.33	0.998622
Shoot	Longjing	5-Methyluridine	0.822856	0.872834			1.18082	0.692159
Leaves	Longjing	Asparagine	1.04	1.34	1.12	1.45	1.07	1.45
Leaves	Longjing	Urea	1.0637	0.89	0.909886	0.74	0.855393	0.88
Leaves	Longjing	Leucine	1.07	1.23	0.95	1.21	0.89	1.24
Leaves	Longjing	Threonine	1.07	1.27	1.33	1.81	1.25	1.71
Root	Longjing	Theanine	1.13351	2.12	1.02968	1.2	0.908403	1.13
Leaves	Longjing	Glycine	1.15	1.29	1.45	1.36	1.26	1.32
Shoot	Longjing	Phenylalanine	1.23	1.07	1.46	1.01
Root	Longjing	Glutamate	1.2382	1.24	1.38346	1.57	1.11731	1.02
Shoot	Longjing	Aminobutyric acid(GABA)	1.24	1.06	1.31	1.05	1.05	1.08
Shoot	Longjing	Valine	1.24	1.07	1.63	1.01	1.32	1.11
Leaves	Longjing	Alanine	1.25	1.41	0.52	1.58	0.42	1.74
Shoot	Longjing	Cadaverine	1.26	1.04	1.67	1.07	1.33	1
Leaves	Longjing	5-Methyluridine	1.27402	1.2	1.40811	1.14	1.10524	0.95
Shoot	Longjing	Aspartic acid(Asparate)	1.29	1.18	1.09	1.18	0.85	1.57
Root	Longjing	Valine	1.29314	1.35	2.3891	1.32	1.84752	1.61
Shoot	Longjing	Tyrosine	1.31	1.02	1.77	0.89	1.36	1.05
Root	Longjing	Alanine	1.33291	1.12	2.4031	1.02	1.8029	1.22
Shoot	Longjing	Theanine	1.34	1.43	1.74	1.8	1.29	1.8
Leaves	Longjing	Norvaline	1.38	1.99	1.8	2.12	1.3	1.5
Shoot	Longjing	Alanine	1.39	1.18	1.32	1.1
Leaves	Longjing	Proline	1.43	1.43			0.8	1.33
Root	Longjing	5-Methyluridine	1.46324	1.46	1.64826	1.14	1.12644	1.01
Leaves	Longjing	Valine	1.59	1.72	2.83	2.48	1.78	2.23
Shoot	Longjing	Glutamic acid(Glutamate)	1.64	2.03	1.64	1.31		1.04
Root	Longjing	Leucine	1.76983	1.16	1.59117	1.56	0.899051	1.54
Shoot	Longjing	Serine	1.82	1.51	2.25	1.1	1.24	1.11
Shoot	Longjing	7-Methylxanthine	1.83	1.28	2.24	1	1.23	1.16
Leaves	Longjing	Isoleucine	1.85	2.22	2.45	2.23	1.32	1.36
Shoot	Longjing	Ornithine	1.91	1.19	2.46	1.11	1.29	1.14
Leaves	Longjing	Serine	1.92	2.46	2.34	2.47	1.22	1.24
Leaves	Longjing	Tryptophan	1.93	1.08	2.96	1.33	1.53	1.02
Leaves	Longjing	Aspartic acid(Asparate)	1.96	1.94	1.16	1.32	0.59	1.7
Shoot	Longjing	Lysine	1.96	6.19	2.85	4.89	1.45	1.67
Root	Longjing	Norvaline	1.98087	1.5	3.5422	1.39	1.7882	1.12
Leaves	Longjing	Cysteine	2.01	1.01	4.31	1.11	2.15	1.04
Leaves	Longjing	Phenylalanine	2.17	1.87	2.29	1.42
Root	Longjing	Proline	2.18569	2.9	2.5374	1.52	1.16092	1.53
Shoot	Longjing	Leucine	2.38	1.17	1.84	1.15		1
Shoot	Longjing	Proline	2.41	1.04	2.47	1.07
Shoot	Longjing	Glycine	2.47	1.08	3.09	1.11	1.25	1.43
Leaves	Longjing	Glutamate	2.56	3.35	4.26	3.51	1.66	2.74
Root	Longjing	Lysine	2.59784	1.21	6.01028	1.31	2.31357	1.4
Root	Longjing	Isoleucine	2.68015	2.14	3.94354	2.15	1.47139	1.12
Root	Longjing	Glutamine	3.1613	3.15	5.33302	3.68	1.68697	2.12
Root	Longjing	Tryptophan	3.19825	1.56	7.08333	1.73	2.21475	2.74
Root	Longjing	Acetamide	3.23414	2.54	1.618	1.47	0.500288	1.39
Shoot	Longjing	Citrulline	3.55	3.25	3.56	2.49
Shoot	Longjing	Glutamine	3.6	4.34	3.78	2.8	1.05	0.91
Root	Longjing	Glycine	3.82902	1.71	7.23024	1.18	1.88827	2.17
Root	Longjing	Asparagine	3.8778	1.22	5.61828	1.36	1.44883	1.04
Leaves	Longjing	Tyrosine	4.31	2.02	8.1	2.12	1.88	1.73
Leaves	Longjing	1,4-Butanediamine	4.43	1.11	15.85	1.32	3.58	1.33
Root	Longjing	1,4-Butanediamine	4.51128	1.61	11.8297	1.5	2.62226	3.15
Root	Longjing	Tyrosine	5.95584	1.02	12.9926	1.36	2.18149	1.29
Root	Longjing	Methionine	6.05472	1.11	16.0907	1.39	2.65755	1.83
Root	Longjing	Serine	6.48842	1.65	14.5176	1.6	2.23747
Leaves	Longjing	Lysine	19.8	3.68	28.72	3.22	1.45	1.71
Root	Longjing	Ornithine	41.1876	2.28	67.6855	1.14	1.64335	2.19
Leaves	Longjing	Theanine	54.37	4.54	54.25	3.49	1	0.28
Leaves	Longjing	Aminobutyric acid(GABA)	.
Leaves	Longjing	Cadaverine			0.83	1.09	0.9	1.04
Root	Longjing	Citrulline			1.05632	1.4	1.05304	1.3
Leaves	Longjing	Acetamide			1.15	1.01	1.12	1.08
Shoot	Longjing	Phenethylamine			1.25	2.04	1.25	1.14
Shoot	Longjing	Cysteine			1.39	1.05	1.37	1.02
Root	Longjing	Cysteine			3.15529	0.84	3.06678	1.32
Shoot	Longjing	1,4-Butanediamine			3.67	1.02	2.54	1.12
Flavonoids
Longjing	Leaves	Kaempferol 3-rhamnoside 7-galacturonide	0.19	1.02			5.94	1.01
Longjing	Root	Gallocatechin	0.2	1.09	2.47	1.04	12.28	1.04
Longjing	Leaves	Quercetin 3-(6''-caffeoylsophorotrioside)	0.26	1.19	0.74	1.08	2.84	1.11
Longjing	Root	Epigallocatechin	0.35	1.08			3.35	1.13
Longjing	Shoot	Epicatechin 3-O-gallate-(4beta->6)-epigallocatechin 3-O-gallate	0.39	1.19	0.67	1.01	1.74	1
Longjing	Root	Catechin gallate	0.39	1.16	1.23	1.15	3.18	1.12
Longjing	Shoot	Cyanidin 3-(6''-caffeyl glucoside)	0.54	5.01	0.83	2.74	1.53	4.19
Longjing	Leaves	Quercetin 3-(3'',6''-di-p-coumarylglucoside)	0.59	6.68	1.5	8.32	2.56	8.84
Longjing	Shoot	Leucodelphinidin 3-[galactosyl-(1->4)-glucoside]	0.61	1.07	0.46	1.19	0.75	1.07
Longjing	Root	Quercetin-3-O-galactoside	0.61	1.53	0.48	1.41	0.78	1.2
Longjing	Leaves	Quercetin3-(6''-malonyl-glucoside)	0.61	1.34	1.67	1.43	2.75	1.45
Longjing	Root	Catechin	0.62	1.12			1.63	1.09
Longjing	Leaves	Myricetin	0.62	1.02			1.7	1.04
Longjing	Shoot	Eriodictyol 7-(6-galloylglucoside)	0.68	1.05			1.39	1.07
Longjing	Shoot	Kaempferol 3-xylosylglucoside	0.7	2.56			1.44	2.82
Longjing	Root	Cyanidin 3-(6''-caffeyl glucoside)	0.7	1.23			1.46	1.16
Longjing	Shoot	Epicatechin gallate	0.73	1.21	0.5	1.75	0.69	1.21
Longjing	Shoot	Kaempferol 3-(2'',3''-diacetyl-4''-p-coumaroylrhamnoside)	0.73	1.15	1.13	1	1.55	1.27
Longjing	Shoot	Quercetin 3-glucoside 7-xyloside	0.73	1.01			1.6	1.14
Longjing	Shoot	Epiafzelechin-(4b->8)-epicatechin 3,3'-digallate	0.74	3.59	0.93	1.34	1.26	3.26
Longjing	Leaves	Gallocatechin gallate	0.75	1.02	1.19	1.01	1.59	1.07
Longjing	Leaves	Quercetin 3-glucoside 7-xyloside	0.75	5.03	1.37	6.83	1.83	7.01
Longjing	Shoot	Epigallocatechin 3-cinnamate	0.77	1.02			1.23	1.1
Longjing	Leaves	Catechin	0.78	3.95	0.62	5.8	0.8	2.97
Longjing	Leaves	Quercetin-3-O-rhamnoside	0.78	1.01	1.45	3.42	1.86	3.22
Longjing	Root	Prodelphinidin A1	0.79	1.59	0.42	1.71	0.53	1.6
Longjing	Shoot	Delphinidin 3-(3''-p-coumaroylglucoside)	0.79	1.02	0.76	1.06
Longjing	Shoot	Epigallocatechin 3-p-coumaroate	0.79	1	0.89	1.01	1.13	1.01
Longjing	Root	Quercetin 3-(2-galloylglucoside)	0.79	1.15	1.29	1.22	0.36	1.2
Longjing	Shoot	Cyanidin-3-arabinoside	0.8	1.13	0.89	1.05	1.11	1.02
Longjing	Leaves	Epigallocatechin gallate	0.8	1.85	1.27	2.38	1.59	2.69
Longjing	Root	Kaempferol 3-(3'',6''-diacetyl-2'',4''-di-p-coumaroylrhamnoside)	0.81	1.4	0.45	1.59	0.55	1.48
Longjing	Shoot	Petunidin	0.81	1.28	0.8	1.02
Longjing	Shoot	Catechin	0.82	5.1	1.03	1.19	1.26	6.07
Longjing	Root	Procyanidin B1	0.83	1.25	1.41	1.29	1.71	1.4
Longjing	Root	Epicatechin 3-O-gallate-(4beta->6)-epigallocatechin 3-O-gallate	0.83	1.03			1.24	1.05
Longjing	Shoot	Kaempferol 3-(3'',6''-diacetyl-2'',4''-di-p-coumaroylrhamnoside)	0.83	1.02			1.26	1.41
Longjing	Shoot	Gallocatechin	0.844216	4.98327	1.04489	2.14678	1.2377	6.17045
Longjing	Leaves	Epicatechin	0.85	5.02	0.89	4.6	1.05	1.79
Longjing	Root	Epigallocatechin gallate	0.85	1.32	1.27	1.34	1.49	1.98
Longjing	Shoot	Kaempferol 3-O-caffeoyl-sophoroside 7-O-glucoside	0.85	1.13			1.22	1.24
Longjing	Root	Cyanidin 3-(3'',6''-dimalonylglucoside)	0.87	1.09	1.49	1.17	1.72	1.21
Longjing	Leaves	Catechin gallate	0.9	5.79	1.06	3.92	1.18	7.01
Longjing	Leaves	Epigallocatechin	0.9	5.3			1.13	5.6
Longjing	Shoot	Myricetin 3-(3''-galloylrhamnoside)	0.91	4.58	1.1	5.33	1.2	8.16
Longjing	Root	Epicatechin	0.96	1.7	0.95	1.17
Longjing	Shoot	Epicatechin	0.96	1.39	1.1	3.17	1.15	4.7
Longjing	Shoot	Quercetin-3-O-rhamnoside	0.96	1.1	1.25	4.76	1.3	5.32
Longjing	Shoot	Epigallocatechin	0.97	2.02	1.09	5.5	1.12	6.8
Longjing	Shoot	Catechin gallate	0.98	1.58	0.98	1.29
Longjing	Shoot	Gallocatechin gallate	1.03	1.94	1.02	1.94
Longjing	Shoot	Epigallocatechin gallate	1.05	4.52	1.03	2.43
Longjing	Shoot	Pelargonidin 3-O-[4-Hydroxy-3-methoxy-E-cinnamoyl- (->4)-a-L-rhamnopyranosyl-(1->6)-b-D-glucopyranoside] 5-O-b-D-glucopyranoside	1.07	1	0.9	1.08	0.84	1.09
Longjing	Shoot	Quercetin-3-O-galactoside	1.09	1.14	1.16	1.31	1.07	1.26
Longjing	Shoot	Dihydromyricetin	1.11	1.08	0.83	1	0.75	1.13
Longjing	Leaves	Epigallocatechin 3,3'-di-gallate	1.15	3.87	0.45	9.08	0.39	8.12
Longjing	Leaves	Epiafzelechin-(4b->8)-epicatechin 3,3'-digallate	1.15	1.04	1.24	1.04		0.2
Longjing	Shoot	Quercetin 3-sophorotrioside 7-rhamnoside	1.17006	0.187296	1.21815	0.253096	1.04109	0.0625195
Longjing	Shoot	Quercetin 3-(3-p-coumaroylglucoside)	1.19	1.22	1.11	0.84	0.93	1.15
Longjing	Root	Quercetin 3-(3'',6''-di-p-coumarylglucoside)	1.22	1.11	0.82	1.05	0.67	1.16
Longjing	Leaves	Epigallocatechin 3-cinnamate	1.23	1.06	0.55	1.3	0.44	1.26
Longjing	Shoot	Eriodictyol 7-(6-trans-p-coumaroylglucoside)	1.26	4.68	1.31	5.43	1.04	1.83
Longjing	Shoot	Delphinidin 3-sam­bubioside	1.26	1.04	1.41	1.11	1.11	1.06
Longjing	Leaves	Kaempferol-3-O-glucoside	1.29	1.71	0.86	1.34	0.66	1.87
Longjing	Shoot	Epigallocatechin 3-(3-methyl-gallate)	1.29	1.04	1.47	1.06
Longjing	Leaves	ent-Epicatechin-(4alpha->8)-ent-epicatechin-(4alpha->8)-ent-epicatechin 3',3''-digallate	1.37	1.04	0.76	1.09	0.55	1
Longjing	Shoot	Gallic acid	1.37	1.42			0.75	1.47
Longjing	Shoot	Epicatechin-(4beta->8)-epigallocatechin 3-O-gallate	1.38	1.76	1.17	1.18	0.85	1.33
Longjing	Shoot	Kaempferol-3-O-glucoside	1.43	3.57	1.23	2.72	0.86	2.57
Longjing	Root	Epicatechin-(4beta->8)-epigallocatechin 3-O-gallate	1.44	1.03			0.61	1.08
Longjing	Leaves	Kaempferol 3-sophoroside 7-glucuronide	1.48	1.09	1.27	1	0.86	0.41
Longjing	Shoot	Quercetin 3-(6''-caffeoylsophorotrioside)	1.48	1.11			0.78	1.01
Longjing	Leaves	Kaempferol 3-sophorotrioside 7-rhamnoside	1.62	1.59	0.53	1.18	0.33	1.47
Longjing	Leaves	Epigallocatechin 3-p-coumaroate	1.74	1.1			0.47	1.11
Longjing	Root	Kaempferol 3-(2''-acetylrhamnoside)	1.8	1.4			0.63	1.25
Longjing	Leaves	Quercetin-3-O-galactoside	1.9	4.27	0.85	2.01	0.45	4.13
Longjing	Leaves	Kaempferol 3-(2'',3''-diacetyl-4''-p-coumaroylrhamnoside)	2.25	1.08	3.31	1.57	1.47	0.91
Longjing	Leaves	Quercetin 3-sophorotrioside 7-rhamnoside	2.27	1.11			0.41	1.17
Longjing	Leaves	Malvidin 3-galactoside	5.43	1.08	7.65	1.17		0.2
Longjing	Leaves	Quercetin 3-(3-p-coumaroylglucoside)	5.84594	0.89	0.534045	0.95	0.0913532	1.29
Longjing	Root	Cyanidin 3-O-(6''-malonyl-arabinoside)	6.12	1.14	8.34	1.02	1.36	1.01
Longjing	Leaves	Kaempferol 3-O-sinapoyl-sophoroside 7-O-glucoside	6.97	1.17			0.02	1.13
Longjing	Leaves	Myricetin 3,3'-digalactoside	9.84	1.73	0.35	1.06
Longjing	Root	Kaempferol 3-(2''-rhamnosyl-6''-acetylgalactoside) 7-rhamnoside	13. 60	1.7	15.67	1.49
Longjing	Leaves	Cyanidin 3-(6''-caffeyl glucoside)			0.18	1.64	0.14	1.63
Longjing	Root	Kaempferol 3-sophoroside 7-glucuronide			0.46	1.23	0.49	1.23
Longjing	Leaves	Naringenin			0.47	1.11	0.4	1.08
Longjing	Leaves	Kaempferol 3-xylosylglucoside			0.49	1.06	0.61	1.09
Longjing	Root	Kaempferol 3-O-sophorotrioside 7-O-sophoroside			0.54	1.25	0.56	1.26
Longjing	Shoot	Quercetin 3-(2-caffeoylglucuronoside)			0.65	1	0.65	1.02
Longjing	Root	Epiafzelechin-(4b->8)-epicatechin 3,3'-digallate			0.66	1.69	0.68	1.73
Longjing	Shoot	Epiafzelechin 3-gallate			0.66	1.06	0.69	1.07
Longjing	Leaves	Epifisetinidol-(4beta->8)-catechin			0.73	1.44	0.6	1.48
Longjing	Shoot	Epigallocatechin 3-gallate 7-glucoside 4"-glucuronide			0.73	1	0.73	1.03
Longjing	Leaves	Epicatechin-(4beta->8)-epigallocatechin 3-O-gallate			0.78	1.24	0.73	1.16
Longjing	Leaves	Gallocatechin			0.8	5.51	0.81	4.34
Longjing	Shoot	Luteolin 6-C-glucoside 8-C-arabinoside			0.82	1.17	0.87	1.06
Longjing	Shoot	Kaempferol 3-sophoroside 7-glucuronide			0.84	1.05	0.9	1.07
Longjing	Leaves	Malvidin 3-(6-acetylglucoside)			1.15	1.11	1.08	1.02
Longjing	Leaves	Kaempferol 7-(6''-galloylglucoside)			1.15	1.09	1.21	1.1
Longjing	Leaves	Quercetin 7-glucuronide 3-rhamnoside			1.19	1.09	1.14	1
Longjing	Shoot	Kaempferol			1.29	0.88	1.35	1.05
Longjing	Shoot	Quercetin 3-(3'',6''-di-p-coumarylglucoside)			1.29	1.19	1.44	1.01
Longjing	Shoot	Myricetin			1.31	1.09	1.26	1.04
Longjing	Leaves	Kaempferol 3-O-feruloyl-caffeoyl-sophoroside 7-O-glucoside			1.32	1.66	1.22	1.18
Longjing	Leaves	Kaempferol			1.46	1.1	1.28	1.09
Longjing	Root	Epigallocatechin 3-(3-methyl-gallate)			2.1	1	2.04	1.02
Longjing	Root	Kaempferitrin			4.23	1.04	3.79	1.09
